# Supplementary material for: Concentration of Essential, Toxic, and Rare Earth Elements in Ready-to-Eat Baby Purees from the Spanish Market
Source: MDPI journal article supplement (doi:10.3390/nu15143251), 2023-07-22
Supplement: s1 [file s1]

**Supplementary Table S2.** Individual levels of REE in each sample of Store Brands of ready-to-eat baby purees. Results expressed in ng/g fresh product.

|            | La    | Ce    | Pr    | Nd    | Pm    | Sm    | Eu    | Gd    | Tb    | Dy    | Ho    | Er    | Tm    | Yb    | Lu    | Sc    | Y     |
|------------|-------|-------|-------|-------|-------|-------|-------|-------|-------|-------|-------|-------|-------|-------|-------|-------|-------|
| Fruit 01   | 4.918 | 8.908 | 1.143 | 4.248 | 0.045 | 0.888 | 0.183 | 0.740 | 0.110 | 0.565 | 0.120 | 0.435 | 0.045 | 0.250 | 0.060 | 3.055 | 4.918 |
| Fruit 02   | 0.518 | 0.788 | 0.140 | 0.368 | 0.233 | 0.138 | 0.085 | 0.163 | 0.078 | 0.145 | 0.068 | 0.200 | 0.055 | 0.088 | 0.070 | 1.043 | 0.518 |
| Fruit 03   | 0.270 | 0.380 | 0.060 | 0.183 | 0.100 | 0.020 | 0.023 | 0.025 | 0.013 | 0.023 | 0.005 | 0.060 | 0.005 | 0.020 | 0.010 | 0.558 | 0.270 |
| Fruit 04   | 1.078 | 2.010 | 0.253 | 0.930 | 0.158 | 0.283 | 0.050 | 0.200 | 0.045 | 0.185 | 0.033 | 0.210 | 0.010 | 0.085 | 0.018 | 0.945 | 1.078 |
| Fruit 05   | 1.263 | 1.880 | 0.240 | 0.742 | 0.050 | 0.150 | 0.048 | 0.163 | 0.033 | 0.208 | 0.025 | 0.245 | 0.010 | 0.098 | 0.008 | 1.260 | 1.263 |
| Fruit 06   | 1.985 | 3.503 | 0.453 | 1.875 | 0.153 | 0.345 | 0.085 | 0.355 | 0.040 | 0.230 | 0.060 | 0.333 | 0.028 | 0.090 | 0.018 | 1.430 | 1.985 |
| Fruit 07   | 0.673 | 1.043 | 0.138 | 0.485 | 0.095 | 0.120 | 0.040 | 0.100 | 0.015 | 0.083 | 0.010 | 0.125 | 0.005 | 0.040 | 0.010 | 1.213 | 0.673 |
| Fruit 08   | 0.678 | 1.478 | 0.160 | 0.625 | 0.018 | 0.145 | 0.028 | 0.148 | 0.020 | 0.110 | 0.010 | 0.148 | 0.008 | 0.048 | 0.008 | 1.285 | 0.678 |
| Fruit 09   | 2.113 | 5.350 | 0.618 | 2.260 | 0.063 | 0.473 | 0.125 | 0.515 | 0.093 | 0.460 | 0.080 | 0.305 | 0.035 | 0.195 | 0.043 | 1.235 | 2.113 |
| Fruit 10   | 2.113 | 3.120 | 0.343 | 1.508 | 0.073 | 0.270 | 0.078 | 0.305 | 0.040 | 0.278 | 0.045 | 0.228 | 0.023 | 0.130 | 0.015 | 1.090 | 2.113 |
| Fruit 11   | 0.798 | 1.418 | 0.125 | 0.635 | 0.015 | 0.125 | 0.025 | 0.123 | 0.018 | 0.095 | 0.013 | 0.098 | 0.003 | 0.035 | 0.005 | 0.920 | 0.798 |
| Fruit 12   | 1.272 | 2.372 | 0.299 | 1.097 | 0.186 | 0.334 | 0.059 | 0.236 | 0.053 | 0.218 | 0.039 | 0.248 | 0.012 | 0.100 | 0.021 | 1.115 | 1.272 |
| Fruit 13   | 1.490 | 2.218 | 0.283 | 0.876 | 0.059 | 0.177 | 0.057 | 0.192 | 0.039 | 0.245 | 0.030 | 0.289 | 0.012 | 0.116 | 0.009 | 1.487 | 1.490 |
| Fruit 14   | 2.342 | 4.134 | 0.535 | 2.213 | 0.181 | 0.407 | 0.100 | 0.419 | 0.047 | 0.271 | 0.071 | 0.393 | 0.033 | 0.106 | 0.021 | 1.687 | 2.342 |
| Fruit 15   | 0.794 | 1.231 | 0.163 | 0.572 | 0.112 | 0.142 | 0.047 | 0.118 | 0.018 | 0.098 | 0.012 | 0.148 | 0.006 | 0.047 | 0.012 | 1.431 | 0.794 |
| Fruit 16   | 0.821 | 1.432 | 0.173 | 0.770 | 0.092 | 0.341 | 0.146 | 0.118 | 0.112 | 0.298 | 0.045 | 0.132 | 0.232 | 0.000 | 0.00  | 1.112 | 0.421 |
| Chicken 01 | 1.283 | 2.105 | 0.238 | 0.818 | 0.115 | 0.138 | 0.040 | 0.138 | 0.023 | 0.088 | 0.008 | 0.085 | 0.000 | 0.025 | 0.008 | 0.605 | 1.283 |
| Chicken 02 | 2.588 | 5.875 | 0.613 | 2.318 | 0.085 | 0.648 | 0.098 | 0.365 | 0.060 | 0.253 | 0.038 | 0.163 | 0.010 | 0.040 | 0.013 | 1.310 | 2.588 |
| Chicken 03 | 0.538 | 1.168 | 0.120 | 0.448 | 0.145 | 0.083 | 0.015 | 0.048 | 0.005 | 0.020 | 0.008 | 0.050 | 0.000 | 0.005 | 0.003 | 0.290 | 0.538 |
| Chicken 04 | 1.893 | 2.993 | 0.358 | 1.335 | 0.050 | 0.303 | 0.068 | 0.235 | 0.030 | 0.123 | 0.038 | 0.090 | 0.008 | 0.053 | 0.005 | 0.703 | 1.893 |
| Chicken 05 | 1.218 | 2.515 | 0.278 | 1.025 | 0.070 | 0.245 | 0.058 | 0.185 | 0.028 | 0.113 | 0.025 | 0.113 | 0.008 | 0.033 | 0.010 | 0.825 | 1.218 |
| Chicken 06 | 1.843 | 3.518 | 0.395 | 1.420 | 0.073 | 0.245 | 0.095 | 0.263 | 0.043 | 0.225 | 0.035 | 0.145 | 0.015 | 0.083 | 0.010 | 1.068 | 1.843 |
| Chicken 07 | 3.608 | 6.018 | 0.640 | 2.015 | 0.128 | 0.390 | 0.068 | 0.263 | 0.038 | 0.215 | 0.025 | 0.203 | 0.005 | 0.055 | 0.018 | 0.728 | 3.608 |
| Chicken 08 | 0.668 | 1.258 | 0.138 | 0.465 | 0.078 | 0.075 | 0.010 | 0.085 | 0.008 | 0.050 | 0.010 | 0.085 | 0.000 | 0.008 | 0.003 | 0.558 | 0.668 |
| Chicken 09 | 2.388 | 3.210 | 0.508 | 1.700 | 0.000 | 0.308 | 0.090 | 0.335 | 0.050 | 0.310 | 0.050 | 0.183 | 0.015 | 0.078 | 0.020 | 0.970 | 2.388 |
| Chicken 10 | 0.742 | 1.318 | 0.155 | 0.448 | 0.078 | 0.095 | 0.030 | 0.085 | 0.005 | 0.063 | 0.010 | 0.073 | 0.003 | 0.025 | 0.015 | 0.363 | 0.742 |
| Chicken 11 | 0.915 | 1.643 | 0.138 | 0.588 | 0.015 | 0.108 | 0.033 | 0.125 | 0.013 | 0.103 | 0.008 | 0.110 | 0.000 | 0.020 | 0.008 | 0.605 | 0.915 |
| Chicken 12 | 0.903 | 1.760 | 0.180 | 0.668 | 0.078 | 0.133 | 0.050 | 0.150 | 0.018 | 0.110 | 0.013 | 0.125 | 0.003 | 0.035 | 0.008 | 0.460 | 0.903 |
| Chicken 13 | 1.580 | 3.330 | 0.420 | 1.438 | 0.000 | 0.295 | 0.145 | 0.248 | 0.035 | 0.170 | 0.038 | 0.310 | 0.008 | 0.083 | 0.015 | 1.043 | 1.580 |
| Chicken 14 | 0.473 | 0.805 | 0.058 | 0.305 | 0.000 | 0.038 | 0.015 | 0.030 | 0.008 | 0.053 | 0.010 | 0.070 | 0.000 | 0.008 | 0.003 | 0.753 | 0.473 |
| Chicken 15 | 1.680 | 3.548 | 0.373 | 1.453 | 0.000 | 0.215 | 0.085 | 0.338 | 0.035 | 0.238 | 0.053 | 0.150 | 0.010 | 0.125 | 0.018 | 1.333 | 1.680 |
| Fish 01    | 1.260 | 2.798 | 0.305 | 1.095 | 0.000 | 0.270 | 0.060 | 0.250 | 0.035 | 0.193 | 0.045 | 0.225 | 0.008 | 0.073 | 0.010 | 1.720 | 1.090 |
| Fish 02    | 0.730 | 1.305 | 0.123 | 0.470 | 0.000 | 0.108 | 0.020 | 0.103 | 0.015 | 0.110 | 0.020 | 0.150 | 0.000 | 0.035 | 0.005 | 2.908 | 0.495 |
| Fish 03    | 0.885 | 1.323 | 0.123 | 0.443 | 0.000 | 0.050 | 0.038 | 0.100 | 0.020 | 0.098 | 0.020 | 0.100 | 0.000 | 0.028 | 0.008 | 0.388 | 0.658 |

|         |       |       |       |       |       |       |       |       |       |       |       |       |       |       |       |       |       |
|---------|-------|-------|-------|-------|-------|-------|-------|-------|-------|-------|-------|-------|-------|-------|-------|-------|-------|
| Fish 04 | 1.383 | 2.088 | 0.198 | 0.813 | 0.000 | 0.183 | 0.045 | 0.140 | 0.015 | 0.148 | 0.018 | 0.193 | 0.005 | 0.055 | 0.010 | 1.043 | 0.668 |
| Fish 05 | 0.718 | 1.325 | 0.140 | 0.535 | 0.000 | 0.133 | 0.018 | 0.135 | 0.018 | 0.063 | 0.023 | 0.130 | 0.003 | 0.063 | 0.010 | 0.583 | 1.088 |
| Fish 06 | 1.140 | 1.875 | 0.205 | 0.742 | 0.000 | 0.170 | 0.033 | 0.168 | 0.023 | 0.155 | 0.035 | 0.225 | 0.008 | 0.078 | 0.013 | 0.848 | 1.063 |
| Fish 07 | 1.487 | 3.302 | 0.360 | 1.292 | 0.000 | 0.319 | 0.071 | 0.295 | 0.041 | 0.228 | 0.053 | 0.266 | 0.009 | 0.086 | 0.012 | 2.030 | 0.500 |
| Fish 08 | 0.861 | 1.540 | 0.145 | 0.555 | 0.000 | 0.127 | 0.024 | 0.122 | 0.018 | 0.130 | 0.024 | 0.177 | 0.000 | 0.041 | 0.006 | 3.431 | 1.840 |
| Fish 09 | 1.044 | 1.561 | 0.145 | 0.523 | 0.000 | 0.059 | 0.045 | 0.118 | 0.024 | 0.116 | 0.024 | 0.118 | 0.000 | 0.033 | 0.009 | 0.458 | 1.275 |
| Fish 10 | 1.632 | 2.464 | 0.234 | 0.959 | 0.000 | 0.216 | 0.053 | 0.165 | 0.018 | 0.175 | 0.021 | 0.228 | 0.006 | 0.065 | 0.012 | 1.231 | 1.558 |
| Fish 11 | 0.847 | 1.564 | 0.165 | 0.631 | 0.000 | 0.157 | 0.021 | 0.159 | 0.021 | 0.074 | 0.027 | 0.153 | 0.004 | 0.074 | 0.012 | 0.688 | 0.900 |
| Fish 12 | 1.345 | 2.213 | 0.242 | 0.876 | 0.000 | 0.201 | 0.039 | 0.198 | 0.027 | 0.183 | 0.041 | 0.266 | 0.009 | 0.092 | 0.015 | 1.001 | 0.475 |
| Beef 01 | 0.458 | 1.583 | 0.000 | 0.333 | 0.098 | 0.290 | 0.050 | 0.193 | 0.053 | 0.253 | 0.008 | 0.073 | 0.013 | 3.223 | 1.418 | 0.458 | 1.583 |
| Beef 02 | 0.338 | 1.260 | 0.000 | 0.203 | 0.063 | 0.210 | 0.030 | 0.145 | 0.033 | 0.205 | 0.010 | 0.070 | 0.013 | 2.230 | 1.153 | 0.338 | 1.260 |
| Beef 03 | 0.983 | 3.778 | 0.000 | 0.763 | 0.113 | 0.765 | 0.103 | 0.455 | 0.093 | 0.300 | 0.020 | 0.113 | 0.028 | 3.490 | 2.505 | 0.983 | 3.778 |
| Beef 04 | 0.390 | 1.363 | 0.000 | 0.295 | 0.123 | 0.285 | 0.050 | 0.225 | 0.048 | 0.280 | 0.010 | 0.093 | 0.010 | 2.183 | 1.630 | 0.390 | 1.363 |
| Beef 05 | 0.540 | 1.868 | 0.000 | 0.393 | 0.116 | 0.342 | 0.059 | 0.228 | 0.063 | 0.299 | 0.009 | 0.086 | 0.015 | 3.803 | 1.178 | 0.540 | 1.868 |
| Beef 06 | 0.399 | 1.487 | 0.000 | 0.240 | 0.074 | 0.248 | 0.035 | 0.171 | 0.039 | 0.242 | 0.012 | 0.083 | 0.015 | 2.631 | 1.533 | 0.399 | 1.487 |
| Beef 07 | 1.160 | 4.458 | 0.000 | 0.900 | 0.133 | 0.903 | 0.122 | 0.537 | 0.110 | 0.354 | 0.024 | 0.133 | 0.033 | 4.118 | 1.293 | 1.160 | 4.458 |
| Beef 08 | 0.460 | 1.608 | 0.000 | 0.348 | 0.145 | 0.336 | 0.059 | 0.266 | 0.057 | 0.330 | 0.012 | 0.110 | 0.012 | 2.576 | 1.100 | 0.460 | 1.608 |
| Beef 09 | 0.405 | 1.401 | 0.000 | 0.295 | 0.087 | 0.257 | 0.044 | 0.171 | 0.047 | 0.224 | 0.007 | 0.065 | 0.012 | 2.852 | 1.255 | 0.405 | 1.401 |
| Beef 10 | 0.299 | 1.115 | 0.000 | 0.180 | 0.056 | 0.186 | 0.027 | 0.128 | 0.029 | 0.181 | 0.009 | 0.062 | 0.012 | 1.973 | 1.020 | 0.299 | 1.115 |
| Beef 11 | 0.870 | 3.343 | 0.000 | 0.675 | 0.100 | 0.677 | 0.091 | 0.403 | 0.082 | 0.265 | 0.018 | 0.100 | 0.025 | 3.088 | 2.217 | 0.870 | 3.343 |
| Beef 12 | 0.345 | 1.206 | 0.000 | 0.261 | 0.109 | 0.252 | 0.044 | 0.199 | 0.042 | 0.248 | 0.009 | 0.082 | 0.009 | 1.932 | 1.442 | 0.345 | 1.206 |
| Beef 13 | 0.333 | 1.235 | 0.000 | 0.303 | 0.090 | 0.255 | 0.048 | 0.190 | 0.048 | 0.248 | 0.015 | 0.093 | 0.015 | 1.673 | 1.965 | 0.333 | 1.235 |
| Beef 14 | 0.220 | 0.700 | 0.000 | 0.113 | 0.045 | 0.125 | 0.020 | 0.095 | 0.028 | 0.135 | 0.005 | 0.033 | 0.008 | 1.430 | 0.760 | 0.220 | 0.700 |
