# Supplementary material for: Concentration of Essential, Toxic, and Rare Earth Elements in Ready-to-Eat Baby Purees from the Spanish Market
Source: MDPI journal article supplement (doi:10.3390/nu15143251), 2023-07-22
Supplement: s1 [file s1]

**Supplementary Table S1.** Individual levels of REE in each sample of Name Brands of ready-to-eat baby purees. Results expressed in ng/g fresh product.

|            | La   | Ce    | Pr   | Nd   | Pm   | Sm   | Eu   | Gd   | Tb   | Dy   | Ho   | Er   | Tm   | Yb   | Lu   | Sc   | Y    |
|------------|------|-------|------|------|------|------|------|------|------|------|------|------|------|------|------|------|------|
| Fruit 01   | 4.92 | 8.91  | 1.14 | 4.25 | 0.05 | 0.89 | 0.18 | 0.74 | 0.11 | 0.57 | 0.12 | 0.44 | 0.05 | 0.25 | 0.06 | 3.06 | 3.37 |
| Fruit 02   | 0.52 | 0.79  | 0.14 | 0.37 | 0.23 | 0.14 | 0.09 | 0.16 | 0.08 | 0.15 | 0.07 | 0.20 | 0.06 | 0.09 | 0.07 | 1.04 | 0.47 |
| Fruit 03   | 0.27 | 0.38  | 0.06 | 0.18 | 0.10 | 0.02 | 0.02 | 0.03 | 0.01 | 0.02 | 0.01 | 0.06 | 0.01 | 0.02 | 0.01 | 0.56 | 0.15 |
| Fruit 04   | 1.08 | 2.01  | 0.25 | 0.93 | 0.16 | 0.28 | 0.05 | 0.20 | 0.05 | 0.19 | 0.03 | 0.21 | 0.01 | 0.09 | 0.02 | 0.95 | 0.96 |
| Fruit 05   | 1.26 | 1.88  | 0.24 | 0.74 | 0.05 | 0.15 | 0.05 | 0.16 | 0.03 | 0.21 | 0.03 | 0.25 | 0.01 | 0.10 | 0.01 | 1.26 | 0.68 |
| Fruit 06   | 1.99 | 3.50  | 0.45 | 1.88 | 0.15 | 0.35 | 0.09 | 0.36 | 0.04 | 0.23 | 0.06 | 0.33 | 0.03 | 0.09 | 0.02 | 1.43 | 1.63 |
| Fruit 07   | 0.67 | 1.04  | 0.14 | 0.49 | 0.10 | 0.12 | 0.04 | 0.10 | 0.02 | 0.08 | 0.01 | 0.13 | 0.01 | 0.04 | 0.01 | 1.21 | 0.51 |
| Fruit 08   | 0.68 | 1.48  | 0.16 | 0.63 | 0.02 | 0.15 | 0.03 | 0.15 | 0.02 | 0.11 | 0.01 | 0.15 | 0.01 | 0.05 | 0.01 | 1.29 | 0.75 |
| Fruit 09   | 2.11 | 5.35  | 0.62 | 2.26 | 0.06 | 0.47 | 0.13 | 0.52 | 0.09 | 0.46 | 0.08 | 0.31 | 0.04 | 0.20 | 0.04 | 1.24 | 2.65 |
| Fruit 10   | 2.11 | 3.12  | 0.34 | 1.51 | 0.07 | 0.27 | 0.08 | 0.31 | 0.04 | 0.28 | 0.05 | 0.23 | 0.02 | 0.13 | 0.02 | 1.09 | 1.89 |
| Fruit 11   | 0.80 | 1.42  | 0.13 | 0.64 | 0.02 | 0.13 | 0.03 | 0.12 | 0.02 | 0.10 | 0.01 | 0.10 | 0.00 | 0.04 | 0.01 | 0.92 | 0.53 |
| Fruit 12   | 2.17 | 4.62  | 0.55 | 2.16 | 0.10 | 0.43 | 0.08 | 0.41 | 0.05 | 0.18 | 0.03 | 0.14 | 0.01 | 0.06 | 0.02 | 1.21 | 0.91 |
| Fruit 13   | 5.80 | 10.51 | 1.35 | 5.01 | 0.05 | 1.05 | 0.22 | 0.87 | 0.13 | 0.67 | 0.14 | 0.51 | 0.05 | 0.30 | 0.07 | 3.60 | 3.97 |
| Fruit 14   | 0.61 | 0.93  | 0.17 | 0.43 | 0.27 | 0.16 | 0.10 | 0.19 | 0.09 | 0.17 | 0.08 | 0.24 | 0.06 | 0.10 | 0.08 | 1.23 | 0.55 |
| Fruit 15   | 0.32 | 0.45  | 0.07 | 0.22 | 0.12 | 0.02 | 0.03 | 0.03 | 0.02 | 0.03 | 0.01 | 0.07 | 0.01 | 0.02 | 0.01 | 0.66 | 0.17 |
| Fruit 16   | 1.27 | 2.37  | 0.30 | 1.10 | 0.19 | 0.33 | 0.06 | 0.24 | 0.05 | 0.22 | 0.04 | 0.25 | 0.01 | 0.10 | 0.02 | 1.12 | 1.13 |
| Fruit 17   | 1.49 | 2.22  | 0.28 | 0.88 | 0.06 | 0.18 | 0.06 | 0.19 | 0.04 | 0.25 | 0.03 | 0.29 | 0.01 | 0.12 | 0.01 | 1.49 | 0.80 |
| Fruit 18   | 2.34 | 4.13  | 0.53 | 2.21 | 0.18 | 0.41 | 0.10 | 0.42 | 0.05 | 0.27 | 0.07 | 0.39 | 0.03 | 0.11 | 0.02 | 1.69 | 1.92 |
| Fruit 19   | 0.60 | 0.92  | 0.12 | 0.43 | 0.08 | 0.11 | 0.04 | 0.09 | 0.01 | 0.07 | 0.01 | 0.11 | 0.00 | 0.04 | 0.01 | 1.07 | 0.45 |
| Fruit 20   | 0.60 | 1.31  | 0.14 | 0.55 | 0.02 | 0.13 | 0.02 | 0.13 | 0.02 | 0.10 | 0.01 | 0.13 | 0.01 | 0.04 | 0.01 | 1.14 | 0.66 |
| Fruit 21   | 1.87 | 4.73  | 0.55 | 2.00 | 0.06 | 0.42 | 0.11 | 0.46 | 0.08 | 0.41 | 0.07 | 0.27 | 0.03 | 0.17 | 0.04 | 1.09 | 2.35 |
| Fruit 22   | 1.87 | 2.76  | 0.30 | 1.33 | 0.06 | 0.24 | 0.07 | 0.27 | 0.04 | 0.25 | 0.04 | 0.20 | 0.02 | 0.12 | 0.01 | 0.96 | 1.67 |
| Fruit 23   | 0.71 | 1.25  | 0.11 | 0.56 | 0.01 | 0.11 | 0.02 | 0.11 | 0.02 | 0.08 | 0.01 | 0.09 | 0.00 | 0.03 | 0.00 | 0.81 | 0.47 |
| Fruit 24   | 1.92 | 4.08  | 0.49 | 1.91 | 0.09 | 0.38 | 0.07 | 0.36 | 0.04 | 0.16 | 0.03 | 0.12 | 0.00 | 0.05 | 0.01 | 1.07 | 0.80 |
| Chicken 01 | 1.28 | 2.11  | 0.24 | 0.82 | 0.12 | 0.14 | 0.04 | 0.14 | 0.02 | 0.09 | 0.01 | 0.09 | 0.00 | 0.03 | 0.01 | 0.61 | 0.53 |
| Chicken 02 | 2.59 | 5.88  | 0.61 | 2.32 | 0.09 | 0.65 | 0.10 | 0.37 | 0.06 | 0.25 | 0.04 | 0.16 | 0.01 | 0.04 | 0.01 | 1.31 | 1.67 |
| Chicken 03 | 0.54 | 1.17  | 0.12 | 0.45 | 0.15 | 0.08 | 0.02 | 0.05 | 0.01 | 0.02 | 0.01 | 0.05 | 0.00 | 0.01 | 0.00 | 0.29 | 0.23 |
| Chicken 04 | 1.89 | 2.99  | 0.36 | 1.34 | 0.05 | 0.30 | 0.07 | 0.24 | 0.03 | 0.12 | 0.04 | 0.09 | 0.01 | 0.05 | 0.01 | 0.70 | 0.98 |
| Chicken 05 | 1.22 | 2.52  | 0.28 | 1.03 | 0.07 | 0.25 | 0.06 | 0.19 | 0.03 | 0.11 | 0.03 | 0.11 | 0.01 | 0.03 | 0.01 | 0.83 | 0.99 |
| Chicken 06 | 1.84 | 3.52  | 0.40 | 1.42 | 0.07 | 0.25 | 0.10 | 0.26 | 0.04 | 0.23 | 0.04 | 0.15 | 0.02 | 0.08 | 0.01 | 1.07 | 1.27 |
| Chicken 07 | 3.61 | 6.02  | 0.64 | 2.02 | 0.13 | 0.39 | 0.07 | 0.26 | 0.04 | 0.22 | 0.03 | 0.20 | 0.01 | 0.06 | 0.02 | 0.73 | 1.56 |
| Chicken 08 | 0.67 | 1.26  | 0.14 | 0.47 | 0.08 | 0.08 | 0.01 | 0.09 | 0.01 | 0.05 | 0.01 | 0.09 | 0.00 | 0.01 | 0.00 | 0.56 | 0.49 |
| Chicken 09 | 2.39 | 3.21  | 0.51 | 1.70 | 0.00 | 0.31 | 0.09 | 0.34 | 0.05 | 0.31 | 0.05 | 0.18 | 0.02 | 0.08 | 0.02 | 0.97 | 1.98 |
| Chicken 10 | 0.74 | 1.32  | 0.16 | 0.45 | 0.08 | 0.10 | 0.03 | 0.09 | 0.01 | 0.06 | 0.01 | 0.07 | 0.00 | 0.03 | 0.02 | 0.36 | 0.59 |

|            |      |      |      |      |      |      |      |      |      |      |      |      |      |      |      |      |      |
|------------|------|------|------|------|------|------|------|------|------|------|------|------|------|------|------|------|------|
| Chicken 11 | 0.92 | 1.64 | 0.14 | 0.59 | 0.02 | 0.11 | 0.03 | 0.13 | 0.01 | 0.10 | 0.01 | 0.11 | 0.00 | 0.02 | 0.01 | 0.61 | 0.59 |
| Chicken 12 | 0.90 | 1.76 | 0.18 | 0.67 | 0.08 | 0.13 | 0.05 | 0.15 | 0.02 | 0.11 | 0.01 | 0.13 | 0.00 | 0.04 | 0.01 | 0.46 | 0.90 |
| Chicken 13 | 0.76 | 1.08 | 0.12 | 0.51 | 0.00 | 0.11 | 0.02 | 0.07 | 0.01 | 0.07 | 0.01 | 0.11 | 0.00 | 0.04 | 0.01 | 0.44 | 0.58 |
| Chicken 14 | 0.58 | 0.99 | 0.07 | 0.43 | 0.10 | 0.05 | 0.02 | 0.05 | 0.01 | 0.04 | 0.01 | 0.10 | 0.00 | 0.03 | 0.01 | 0.46 | 0.27 |
| Chicken 15 | 1.55 | 2.22 | 0.23 | 1.03 | 0.03 | 0.25 | 0.06 | 0.17 | 0.03 | 0.13 | 0.02 | 0.14 | 0.00 | 0.04 | 0.01 | 1.38 | 1.00 |
| Chicken 16 | 1.51 | 2.48 | 0.28 | 0.97 | 0.14 | 0.16 | 0.05 | 0.16 | 0.03 | 0.10 | 0.01 | 0.10 | 0.00 | 0.03 | 0.01 | 0.71 | 0.62 |
| Chicken 17 | 3.05 | 6.93 | 0.72 | 2.74 | 0.10 | 0.76 | 0.12 | 0.43 | 0.07 | 0.30 | 0.04 | 0.19 | 0.01 | 0.05 | 0.02 | 1.55 | 1.97 |
| Chicken 18 | 0.63 | 1.38 | 0.14 | 0.53 | 0.17 | 0.10 | 0.02 | 0.06 | 0.01 | 0.02 | 0.01 | 0.06 | 0.00 | 0.01 | 0.00 | 0.34 | 0.27 |
| Chicken 19 | 2.23 | 3.53 | 0.42 | 1.58 | 0.06 | 0.36 | 0.08 | 0.28 | 0.04 | 0.15 | 0.04 | 0.11 | 0.01 | 0.06 | 0.01 | 0.83 | 1.15 |
| Chicken 20 | 1.44 | 2.97 | 0.33 | 1.21 | 0.08 | 0.29 | 0.07 | 0.22 | 0.03 | 0.13 | 0.03 | 0.13 | 0.01 | 0.04 | 0.01 | 0.97 | 1.16 |
| Chicken 21 | 2.17 | 4.15 | 0.47 | 1.68 | 0.09 | 0.29 | 0.11 | 0.31 | 0.05 | 0.27 | 0.04 | 0.17 | 0.02 | 0.10 | 0.01 | 1.26 | 1.49 |
| Chicken 22 | 4.26 | 7.10 | 0.76 | 2.38 | 0.15 | 0.46 | 0.08 | 0.31 | 0.04 | 0.25 | 0.03 | 0.24 | 0.01 | 0.06 | 0.02 | 0.86 | 1.84 |
| Chicken 23 | 0.79 | 1.48 | 0.16 | 0.55 | 0.09 | 0.09 | 0.01 | 0.10 | 0.01 | 0.06 | 0.01 | 0.10 | 0.00 | 0.01 | 0.00 | 0.66 | 0.57 |
| Chicken 24 | 2.82 | 3.79 | 0.60 | 2.01 | 0.00 | 0.36 | 0.11 | 0.40 | 0.06 | 0.37 | 0.06 | 0.22 | 0.02 | 0.09 | 0.02 | 1.14 | 2.34 |
| Fish 01    | 2.51 | 5.51 | 0.54 | 2.27 | 0.00 | 0.57 | 0.08 | 0.39 | 0.06 | 0.25 | 0.06 | 0.26 | 0.02 | 0.12 | 0.02 | 2.26 | 1.62 |
| Fish 02    | 3.73 | 7.02 | 0.39 | 1.69 | 0.00 | 0.32 | 0.07 | 0.31 | 0.04 | 0.25 | 0.05 | 0.19 | 0.01 | 0.08 | 0.02 | 2.28 | 1.18 |
| Fish 03    | 0.89 | 1.32 | 0.12 | 0.44 | 0.00 | 0.05 | 0.04 | 0.10 | 0.02 | 0.10 | 0.02 | 0.10 | 0.00 | 0.03 | 0.01 | 0.39 | 0.66 |
| Fish 04    | 1.38 | 2.09 | 0.20 | 0.81 | 0.00 | 0.18 | 0.05 | 0.14 | 0.02 | 0.15 | 0.02 | 0.19 | 0.01 | 0.06 | 0.01 | 1.04 | 0.67 |
| Fish 05    | 1.58 | 3.58 | 0.37 | 1.28 | 0.00 | 0.28 | 0.07 | 0.23 | 0.04 | 0.19 | 0.03 | 0.21 | 0.01 | 0.08 | 0.02 | 1.72 | 1.09 |
| Fish 06    | 1.56 | 3.25 | 0.31 | 1.40 | 0.00 | 0.35 | 0.07 | 0.26 | 0.04 | 0.21 | 0.04 | 0.22 | 0.01 | 0.10 | 0.01 | 1.72 | 1.06 |
| Fish 07    | 0.74 | 1.28 | 0.11 | 0.55 | 0.00 | 0.13 | 0.03 | 0.10 | 0.01 | 0.10 | 0.03 | 0.15 | 0.00 | 0.05 | 0.01 | 0.49 | 0.50 |
| Fish 08    | 1.64 | 3.02 | 0.34 | 1.37 | 0.00 | 0.28 | 0.05 | 0.30 | 0.04 | 0.25 | 0.04 | 0.20 | 0.02 | 0.11 | 0.02 | 1.46 | 1.84 |
| Fish 09    | 1.88 | 3.85 | 0.43 | 1.67 | 0.00 | 0.32 | 0.08 | 0.27 | 0.04 | 0.26 | 0.05 | 0.26 | 0.01 | 0.09 | 0.02 | 1.72 | 1.28 |
| Fish 10    | 1.65 | 2.94 | 0.33 | 1.48 | 0.00 | 0.27 | 0.06 | 0.24 | 0.04 | 0.19 | 0.05 | 0.24 | 0.01 | 0.09 | 0.02 | 1.02 | 1.56 |
| Fish 11    | 1.06 | 2.24 | 0.27 | 1.09 | 0.00 | 0.20 | 0.07 | 0.22 | 0.05 | 0.23 | 0.04 | 0.21 | 0.01 | 0.07 | 0.02 | 1.70 | 0.90 |
| Fish 12    | 0.47 | 0.96 | 0.12 | 0.51 | 0.00 | 0.10 | 0.01 | 0.08 | 0.02 | 0.09 | 0.02 | 0.14 | 0.00 | 0.03 | 0.01 | 0.51 | 0.48 |
| Fish 13    | 0.72 | 1.33 | 0.14 | 0.54 | 0.00 | 0.13 | 0.02 | 0.14 | 0.02 | 0.06 | 0.02 | 0.13 | 0.00 | 0.06 | 0.01 | 0.58 | 0.59 |
| Fish 14    | 1.14 | 1.88 | 0.21 | 0.74 | 0.00 | 0.17 | 0.03 | 0.17 | 0.02 | 0.16 | 0.04 | 0.23 | 0.01 | 0.08 | 0.01 | 0.85 | 0.73 |
| Fish 15    | 2.22 | 4.87 | 0.48 | 2.00 | 0.00 | 0.50 | 0.07 | 0.35 | 0.05 | 0.22 | 0.05 | 0.23 | 0.02 | 0.11 | 0.02 | 2.00 | 1.43 |
| Fish 16    | 3.30 | 6.21 | 0.35 | 1.49 | 0.00 | 0.28 | 0.06 | 0.27 | 0.03 | 0.22 | 0.04 | 0.17 | 0.01 | 0.07 | 0.01 | 2.02 | 1.05 |
| Fish 17    | 0.78 | 1.17 | 0.11 | 0.39 | 0.00 | 0.04 | 0.03 | 0.09 | 0.02 | 0.09 | 0.02 | 0.09 | 0.00 | 0.02 | 0.01 | 0.34 | 0.58 |
| Fish 18    | 1.22 | 1.85 | 0.18 | 0.72 | 0.00 | 0.16 | 0.04 | 0.12 | 0.01 | 0.13 | 0.02 | 0.17 | 0.00 | 0.05 | 0.01 | 0.92 | 0.59 |
| Fish 19    | 1.40 | 3.16 | 0.32 | 1.14 | 0.00 | 0.25 | 0.06 | 0.20 | 0.03 | 0.16 | 0.03 | 0.19 | 0.01 | 0.07 | 0.02 | 1.52 | 0.96 |
| Fish 20    | 1.38 | 2.87 | 0.27 | 1.23 | 0.00 | 0.31 | 0.06 | 0.23 | 0.03 | 0.18 | 0.03 | 0.19 | 0.01 | 0.09 | 0.01 | 1.52 | 0.94 |
| Fish 21    | 0.66 | 1.14 | 0.10 | 0.49 | 0.00 | 0.12 | 0.03 | 0.09 | 0.01 | 0.08 | 0.03 | 0.14 | 0.00 | 0.05 | 0.00 | 0.43 | 0.44 |
| Fish 22    | 1.45 | 2.67 | 0.30 | 1.22 | 0.00 | 0.25 | 0.05 | 0.26 | 0.04 | 0.22 | 0.03 | 0.17 | 0.02 | 0.09 | 0.02 | 1.29 | 1.63 |
| Fish 23    | 1.66 | 3.41 | 0.38 | 1.48 | 0.00 | 0.28 | 0.07 | 0.24 | 0.03 | 0.23 | 0.05 | 0.23 | 0.01 | 0.08 | 0.01 | 1.52 | 1.13 |

|         |       |       |      |       |      |      |      |      |      |      |      |      |      |      |      |      |      |
|---------|-------|-------|------|-------|------|------|------|------|------|------|------|------|------|------|------|------|------|
| Fish 24 | 1.46  | 2.60  | 0.29 | 1.31  | 0.00 | 0.23 | 0.05 | 0.21 | 0.04 | 0.17 | 0.04 | 0.22 | 0.01 | 0.08 | 0.02 | 0.90 | 1.38 |
| Fish 25 | 0.93  | 1.98  | 0.23 | 0.96  | 0.00 | 0.18 | 0.06 | 0.20 | 0.04 | 0.20 | 0.04 | 0.19 | 0.01 | 0.06 | 0.02 | 1.50 | 0.80 |
| Fish 26 | 0.41  | 0.85  | 0.10 | 0.45  | 0.00 | 0.08 | 0.01 | 0.07 | 0.02 | 0.08 | 0.02 | 0.12 | 0.00 | 0.03 | 0.00 | 0.45 | 0.42 |
| Fish 27 | 0.64  | 1.17  | 0.12 | 0.47  | 0.00 | 0.12 | 0.02 | 0.12 | 0.02 | 0.06 | 0.02 | 0.12 | 0.00 | 0.06 | 0.01 | 0.52 | 0.52 |
| Fish 28 | 1.01  | 1.66  | 0.18 | 0.66  | 0.00 | 0.15 | 0.03 | 0.15 | 0.02 | 0.14 | 0.03 | 0.20 | 0.01 | 0.07 | 0.01 | 0.75 | 0.64 |
| Beef 01 | 9.57  | 20.74 | 2.34 | 8.84  | 0.00 | 1.55 | 0.11 | 1.21 | 0.13 | 0.57 | 0.09 | 0.27 | 0.02 | 0.13 | 0.02 | 4.80 | 2.20 |
| Beef 02 | 1.51  | 2.35  | 0.22 | 0.80  | 0.00 | 0.21 | 0.06 | 0.19 | 0.03 | 0.10 | 0.03 | 0.14 | 0.00 | 0.05 | 0.01 | 0.87 | 0.70 |
| Beef 03 | 2.93  | 6.71  | 0.75 | 3.04  | 0.00 | 0.50 | 0.08 | 0.48 | 0.07 | 0.38 | 0.08 | 0.26 | 0.03 | 0.21 | 0.02 | 1.99 | 1.79 |
| Beef 04 | 2.64  | 5.16  | 0.52 | 2.08  | 0.00 | 0.40 | 0.10 | 0.39 | 0.07 | 0.35 | 0.07 | 0.22 | 0.02 | 0.13 | 0.02 | 2.35 | 1.57 |
| Beef 05 | 1.79  | 3.18  | 0.31 | 1.25  | 0.00 | 0.27 | 0.08 | 0.25 | 0.04 | 0.21 | 0.03 | 0.14 | 0.01 | 0.09 | 0.01 | 1.41 | 1.18 |
| Beef 06 | 1.63  | 2.96  | 0.31 | 1.16  | 0.00 | 0.31 | 0.07 | 0.25 | 0.04 | 0.22 | 0.04 | 0.18 | 0.02 | 0.10 | 0.02 | 1.16 | 1.53 |
| Beef 07 | 1.47  | 2.37  | 0.26 | 1.13  | 0.00 | 0.26 | 0.05 | 0.19 | 0.04 | 0.19 | 0.03 | 0.16 | 0.01 | 0.06 | 0.02 | 3.64 | 1.29 |
| Beef 08 | 1.43  | 2.78  | 0.26 | 1.10  | 0.00 | 0.27 | 0.05 | 0.24 | 0.04 | 0.15 | 0.03 | 0.17 | 0.01 | 0.06 | 0.01 | 1.04 | 1.10 |
| Beef 09 | 2.41  | 4.55  | 0.51 | 1.67  | 0.00 | 0.27 | 0.09 | 0.23 | 0.03 | 0.10 | 0.03 | 0.15 | 0.01 | 0.06 | 0.01 | 2.28 | 0.88 |
| Beef 10 | 1.31  | 2.33  | 0.23 | 0.91  | 0.00 | 0.17 | 0.06 | 0.19 | 0.03 | 0.13 | 0.03 | 0.14 | 0.01 | 0.06 | 0.01 | 1.26 | 0.85 |
| Beef 11 | 3.08  | 5.82  | 0.55 | 2.13  | 0.00 | 0.41 | 0.13 | 0.53 | 0.07 | 0.35 | 0.09 | 0.35 | 0.03 | 0.14 | 0.02 | 2.35 | 2.96 |
| Beef 12 | 1.64  | 2.76  | 0.24 | 1.01  | 0.01 | 0.23 | 0.04 | 0.17 | 0.02 | 0.11 | 0.04 | 0.20 | 0.01 | 0.06 | 0.01 | 2.30 | 1.02 |
| Beef 13 | 1.65  | 3.13  | 0.33 | 1.24  | 0.00 | 0.30 | 0.09 | 0.26 | 0.05 | 0.19 | 0.05 | 0.25 | 0.02 | 0.09 | 0.02 | 1.67 | 1.97 |
| Beef 14 | 11.30 | 24.47 | 2.76 | 10.43 | 0.00 | 1.83 | 0.13 | 1.42 | 0.15 | 0.67 | 0.10 | 0.32 | 0.02 | 0.15 | 0.02 | 5.66 | 2.59 |
| Beef 15 | 1.78  | 2.77  | 0.25 | 0.95  | 0.00 | 0.25 | 0.06 | 0.22 | 0.03 | 0.12 | 0.03 | 0.16 | 0.00 | 0.06 | 0.01 | 1.03 | 0.83 |
| Beef 16 | 3.46  | 7.92  | 0.88 | 3.58  | 0.00 | 0.59 | 0.09 | 0.56 | 0.08 | 0.45 | 0.09 | 0.30 | 0.04 | 0.25 | 0.02 | 2.35 | 2.11 |
| Beef 17 | 3.12  | 6.09  | 0.61 | 2.45  | 0.00 | 0.48 | 0.11 | 0.46 | 0.08 | 0.41 | 0.08 | 0.26 | 0.02 | 0.15 | 0.03 | 2.77 | 1.85 |
| Beef 18 | 2.11  | 3.75  | 0.37 | 1.48  | 0.00 | 0.31 | 0.09 | 0.30 | 0.04 | 0.25 | 0.04 | 0.17 | 0.01 | 0.11 | 0.01 | 1.66 | 1.39 |
| Beef 19 | 1.92  | 3.49  | 0.37 | 1.37  | 0.00 | 0.36 | 0.09 | 0.30 | 0.05 | 0.26 | 0.05 | 0.21 | 0.02 | 0.12 | 0.02 | 1.37 | 1.81 |
| Beef 20 | 1.73  | 2.79  | 0.31 | 1.34  | 0.00 | 0.30 | 0.06 | 0.23 | 0.04 | 0.22 | 0.04 | 0.19 | 0.01 | 0.07 | 0.02 | 4.29 | 1.53 |
| Beef 21 | 1.68  | 3.28  | 0.31 | 1.30  | 0.00 | 0.32 | 0.05 | 0.28 | 0.04 | 0.18 | 0.04 | 0.20 | 0.01 | 0.06 | 0.01 | 1.23 | 1.30 |
| Beef 22 | 2.84  | 5.37  | 0.60 | 1.97  | 0.00 | 0.31 | 0.10 | 0.27 | 0.03 | 0.12 | 0.04 | 0.17 | 0.01 | 0.06 | 0.02 | 2.69 | 1.03 |
| Beef 23 | 1.15  | 2.06  | 0.20 | 0.81  | 0.00 | 0.15 | 0.05 | 0.17 | 0.03 | 0.11 | 0.02 | 0.13 | 0.01 | 0.05 | 0.01 | 1.12 | 0.75 |
| Beef 24 | 2.72  | 5.15  | 0.48 | 1.88  | 0.00 | 0.36 | 0.11 | 0.46 | 0.06 | 0.31 | 0.08 | 0.31 | 0.02 | 0.12 | 0.02 | 2.08 | 2.62 |
| Beef 25 | 1.45  | 2.44  | 0.21 | 0.89  | 0.01 | 0.21 | 0.04 | 0.15 | 0.02 | 0.10 | 0.03 | 0.18 | 0.01 | 0.05 | 0.01 | 2.04 | 0.90 |
| Beef 26 | 1.46  | 2.77  | 0.29 | 1.09  | 0.00 | 0.27 | 0.08 | 0.23 | 0.04 | 0.17 | 0.04 | 0.22 | 0.01 | 0.08 | 0.01 | 1.48 | 1.74 |
